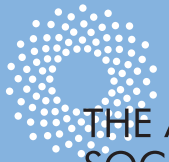

Published by  
**THE AMERICAN  
SOCIETY FOR  
CELL  
BIOLOGY**

*The science of life, the life of science*

**CBE**

# Life Sciences Education

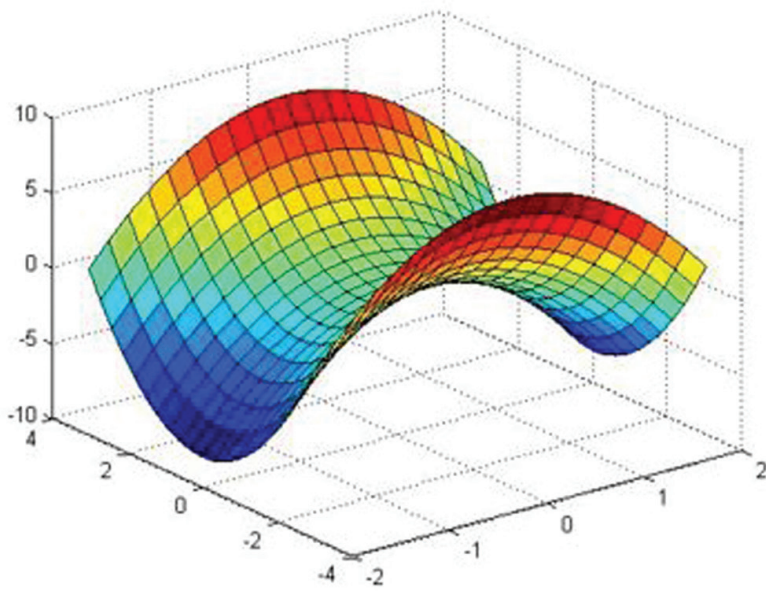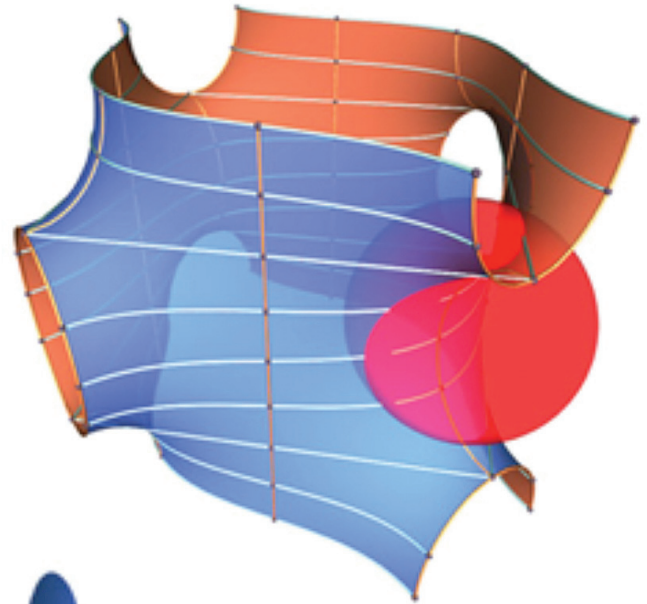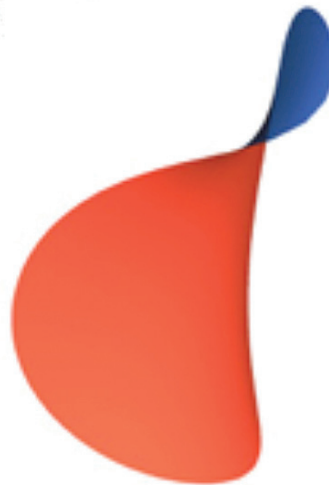

## Special Issue: Integrating Physics and Biology Education
